# Supplementary material
Source: publisher site journal article supplement (https://www.dovepress.com/article/585233)
Supplement: Supplementary file 1 [file Supplementary%20Table%20S1.docx]

**Supplementary materials**

Table S1. Item selections for panvascular health screening tool.

| Screening phases | Assessment Content | Screening Item | Reference / Comments |
| --- | --- | --- | --- |
| Phase 1: Identify primary, secondary and above prevention populations | Panvascular risk factor assessment | 1) Age ≥ 50 | 1 |
| 2) Family history (genetics) | 1 |
|  | 3) Hypertension | 1 |
|  | 4) Diabetes | 1,2 |
|  | 5) Hyperlipidemia (dyslipidemia) | 1 |
|  |  | 6) Obesity (body mass index ≥ 28) | 1 |
|  |  | 7) Smoking | 1 |
|  |  | 8) Air quality (PM2.5) | 3 |
|  |  | 9) Physical inactivity | 1 |
|  |  | 10) Unhealthy diet | 1 |
|  | Panvascular high-risk factor assessment | 1) Atherosclerosis | 4 |
|  | 2) Hypertension & myocardial hypertrophy | 5 |
|  | 3) Cancer | 6 |
|  | 4) Diabetes | 1,2 |
|  |  | 5) Non-alcoholic fatty liver disease | 7 |
|  |  | 6) Obesity (body mass index ≥ 28) | 8 |
|  |  | 7) Chronic kidney disease stage 3–4 or uremia | 9 |
|  |  | 8) Acute lung injury / pulmonary hypertension | 10 |
| Phase 2: Identify secondary and tertiary prevention populations | Major panvascular events | 1) Acute myocardial infarction, cardiac arrest | Due to obstruction of coronary blood flow, the myocardium does not receive sufficient oxygen, resulting in myocardial tissue damage or death |
| 2) Stroke (ischemic or hemorrhagic) | Ischemic stroke: interruption of blood supply, most commonly caused by thrombus formation. Hemorrhagic stroke: rupture of a blood vessel leading to intracerebral hemorrhage. |
| 3) Cognitive decline affecting daily function | Cognitive decline impacting social, occupational, or daily life functions: Long-term vascular issues can affect the brain, potentially leading to dementia. |
|  | 4) Acute or chronic vision loss | Vision loss (Acute or Chronic): Visual impairment due to retinal vascular occlusion. |
|  |  | 5) Venous thrombosis / pulmonary embolism | Venous thromboembolism and pulmonary embolism: Clots (thrombi) forming in veins that may break loose and travel to the lungs, blocking blood flow. |
|  |  | 6) Symptomatic peripheral vascular disease | Symptomatic peripheral vascular disease with a history of revascularization or amputation: Affects leg vessels, causing difficulty walking and potentially requiring amputation in severe cases. |
|  |  | 7) Limb ischemia with pain/ulcer/amputation | Limb ischemia with severe pain, ulcers, or history of amputation: Restricted blood flow to limbs (especially legs) causing pain and ulcers. |
|  |  | 8) Fatigue and weakness | Due to affected blood circulation, the ability of various body parts to obtain oxygen and nutrients decreases, potentially leading to a sense of fatigue and overall weakness. |
|  | Panvascular related-symptoms assessment | 1) Chest pain or tightness (angina) | A symptom of coronary artery disease within pan-vascular diseases; particularly when the blood vessels of the heart are affected. |
|  |  | 2) Shortness of breath | Related to cardiovascular disease, especially when the heart is unable to pump blood effectively. |
|  |  | 3) Dizziness or syncope | Potential for temporary dizziness or fainting due to insufficient blood supply to the brain. |
|  |  | 4) Limb pain or cramping | Especially during activity in the affected area, such as calf pain during walking (intermittent claudication) caused by peripheral artery disease. |
|  |  | 5) Coldness/numbness in extremities | Especially in the hands and feet, which may be caused by poor blood circulation. |
|  |  | 6) Lower limb edema | Refers to fluid accumulation in body tissues, particularly occurring when cardiovascular function is weakened or during the formation of deep vein thrombosis. |
|  |  | 7) Blurred vision or visual field loss | Due to pathological changes in the retinal blood vessels, issues such as blurred vision or loss of the visual field may occur. |
|  |  | 8) Non-specific symptoms (nausea, arrhythmia, etc.) | These symptoms may be associated with cardiovascular diseases. |
| Phase 3: Tertiary prevention – chronic disease clinic triage: diabetes, hypertension, cardiovascular disease, stroke, osteoporosis | Physical Exam  Ophthalmology exam | 1) Body mass index | Height, weight |
| 2) Waist-to-hip ratio  3) Blood pressure  4) Resting heart rate | Waist and hip circumferences  Systolic and diastolic blood pressure11  Routine test |
| 5) Ankle-brachial index | 12 |
| 1) Intraocular pressure, fundus photography | 12 |
| 2) Routine blood cell count |  |
| Laboratory test | 3) Urinalysis |  |
|  | 4) Fasting glucose / 2-hr postprandial blood glucose / HbA1c / insulin / C-peptide | 13 |
|  | Lipid panel |  |
|  | Serum cystatin C measurement Arteriosclerosis Index |  |
|  | 5) Coagulation panel | 14 |
|  | hs-C-reactive protein, homocysteine |  |
|  | Troponin I, BNP/NT-proBNP |  |
|  |  | Resting / 24-hr Holter |  |
|  | Electrocardiogram | DXA Bone Mineral Density / Peripheral Bone Mineral Density | 15 |
|  | VBP-9 arterial stiffness | Thoracic and lumbar vertebrae | 15 |
|  | Bone density | Head, heart, coronary artery | 14 |
|  | Color Doppler | Carotid artery, heart, lower extremity arteries | 12 |
|  | Cerebrovascular blood flow test | Transcranial Doppler | 14 |

**References**

1. Yang J ZY, GE JB. [Panvascular disease prevention and control—From treatment to comprehensive management]. *Chinese Journal of Cardiovascular Diseases.* 2021;4(1):6.

2. Ge JB WJ, Zeng Q. [Chinese Expert Consensus on Risk Assessment and Management of Panvascular Disease in Patients with Type 2 Diabetes]. *Chinese Circulation Journal.* 2022;37(10):6.

3. Yang Y WK, Huo Y. [Scientific Statement on the Comprehensive Prevention and Treatment of Panvascular Disease]. *Chinese Circulation Journal.* 2019;34(11):6.

4. Ge JB. [Concept of Systems Biology to Promote the Development of Panvascular Medicine]. *Chinese Journal of Cardiology.* 2016;44(5):2.

5. National Cardiovascular Disease Expert Committee Heart Failure Professional Committee CMDAHFPC, Heart Failure Group of the Cardiovascular Branch of the Chinese Medical Association. [Chinese Guidelines for Hypertrophic Cardiomyopathy]. *Chinese Journal of Heart Failure and Cardiomyopathy.* 2022;6(2):26.

6. JB G. [Interventinoal Therapy for "Relieve, Block, and Repair"]. 2024. Accessed March, 2024.

7. Gu Y ZB. [Non-Alcoholic Fatty Liver Disease and Vascular Disease: A Review of Clinical Evidence and Mechanisms]. *Advances in Clinical Medicine.* 2023;13(8):12.

8. WS N. [Research Progress on Obesity and Vascular Complications of Diabetes]. *Advances in Clinical Medicine.* 2023;13(3):8.

9. Zhu YX BY. [Research Progress on the Relationship between Chronic Kidney Disease and Cardiovascular Disease]. *CJournal of Clinical Nephrology.* 2019;19(2):4.

10. Pulmonary Embolism and Pulmonary Vascular Disease Group of the Respiratory Disease Branch of the Chinese Medical Association PEaPVDWCotRPBo. [Chinese Guidelines for the Diagnosis and Treatment of Pulmonary Arterial Hypertension]. *Chinese Medical Journal.* 2021;101(1):41.

11. Hypertension: National Center for Cardiovascular Diseases CMDA, Hypertension Professional Committee of the Chinese Medical Doctor Association. [Chinese Guidelines for Clinical Practice of Hypertension]. *Chinese Journal of Cardiology.* 2022;50(11):46.

12. Yang Y ZY, Ge JB. [Screening and Early Detection of Panvascular Disease]. *Shanghai Medical Journal.* 2022;45(5):5.

13. Association DDSotCM. [Chinese Guidelines for the Prevention and Treatment of Type 2 Diabetes]. *Chinese Journal of Endocrinology and Metabolism.* 2021;37(4):88.

14. Stroke: Chinese Medical Association CMAPH, General Practice Branch of the Chinese Medical Association. [Guidelines for Primary Care Diagnosis and Treatment of Ischemic Stroke]. *Chinese Journal of General Practitioners.* 2021;20(9):20.

15. Osteoporosis: Chinese Medical Association CMAPH, General Practice Branch of the Chinese Medical Association. [Guidelines for Primary Care Diagnosis and Treatment of Primary Osteoporosis]. *Chinese Journal of General Practitioners.* 2020;19(4):12.
